# Supplementary figures and images for: Morphology, Ultrastructure, and Mitochondrial Genome of the Marine Non-Photosynthetic Bicosoecid Cafileria marina Gen. et sp. nov
Source: MDPI journal article supplement (doi:10.3390/microorganisms7080240), 2019-08-05

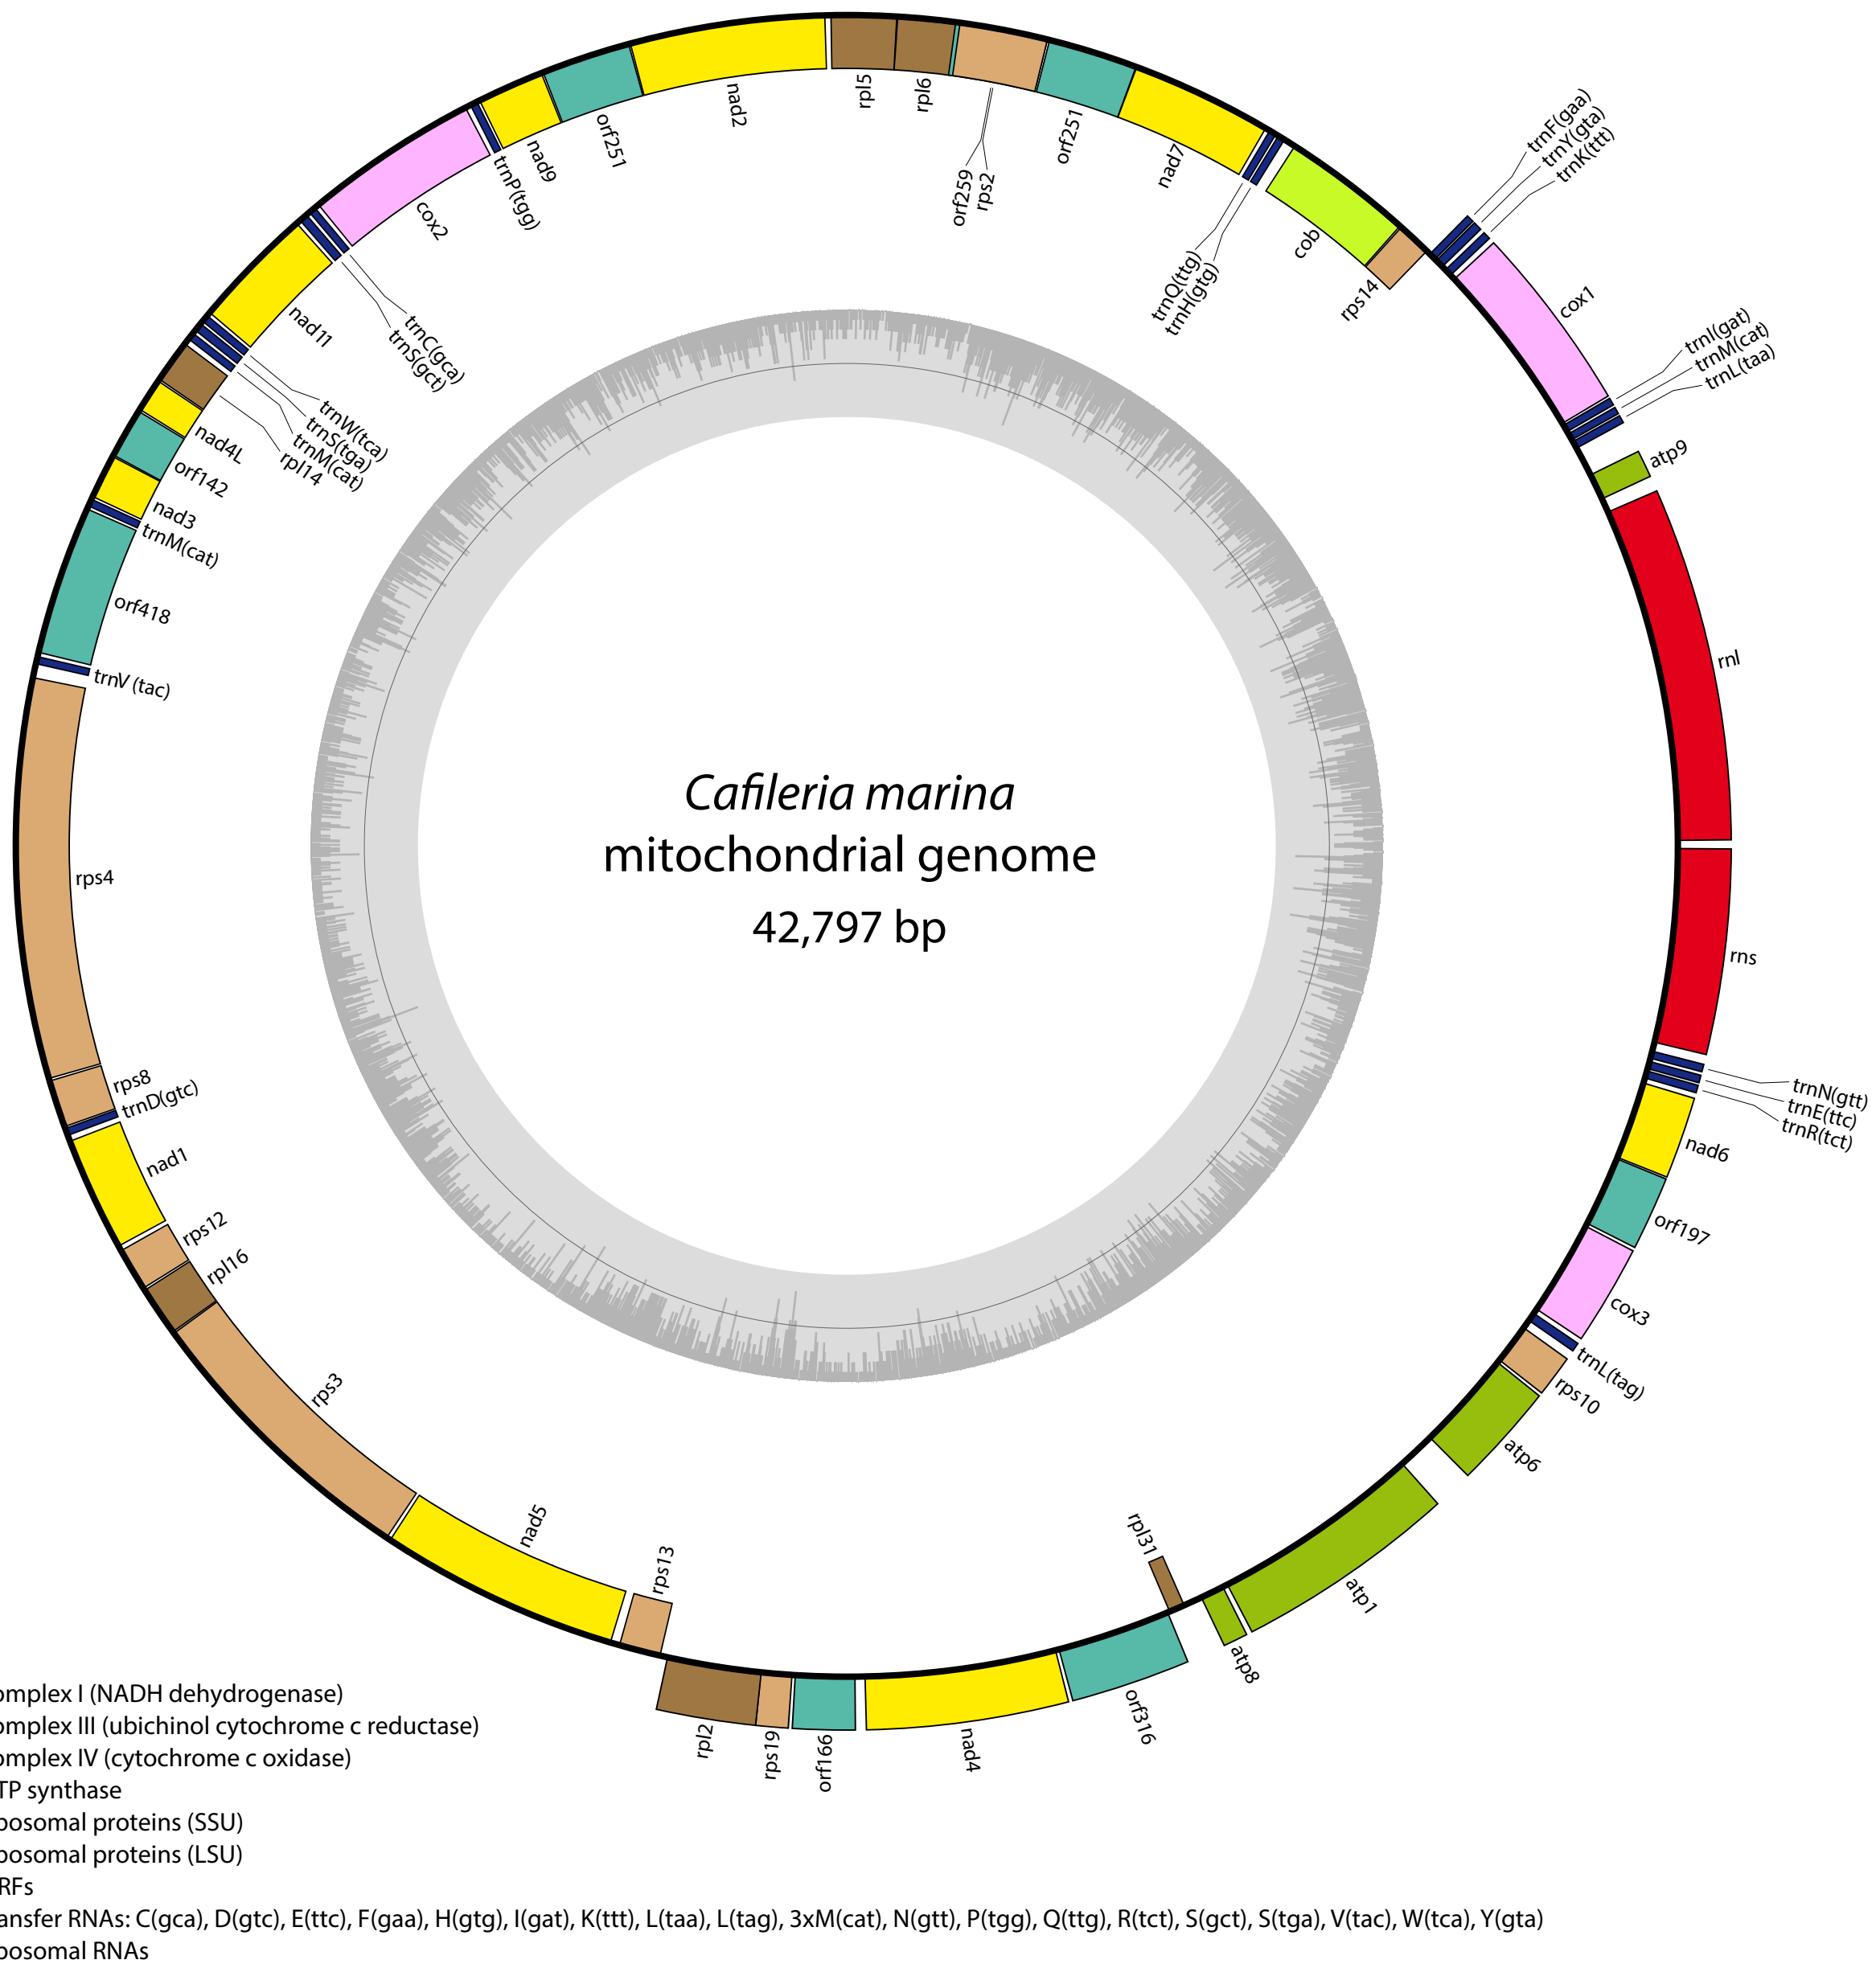

Supplement: s1 [file s1]
